# Supplementary material for: Optimization and Transfollicular Delivery of Finasteride-Loaded Proniosomes for Hair Growth Stimulation in C57BL/6Mlac Mice
Source: MDPI journal article supplement (doi:10.3390/pharmaceutics13122177), 2021-12-17
Supplement: s1 [file s1]

# Supplementary Materials: Optimization and Transfollicular Delivery of Finasteride-Loaded Proniosomes for Hair Growth Stimulation in C57BL/6Mlac Mice

Wandee Rungseevijitprapa, Panikchar Wichayapreechar, Bhagavathi Sundaram Sivamaruthi, Damrongsak Jinarat, Chaiyavat Chaiyasut

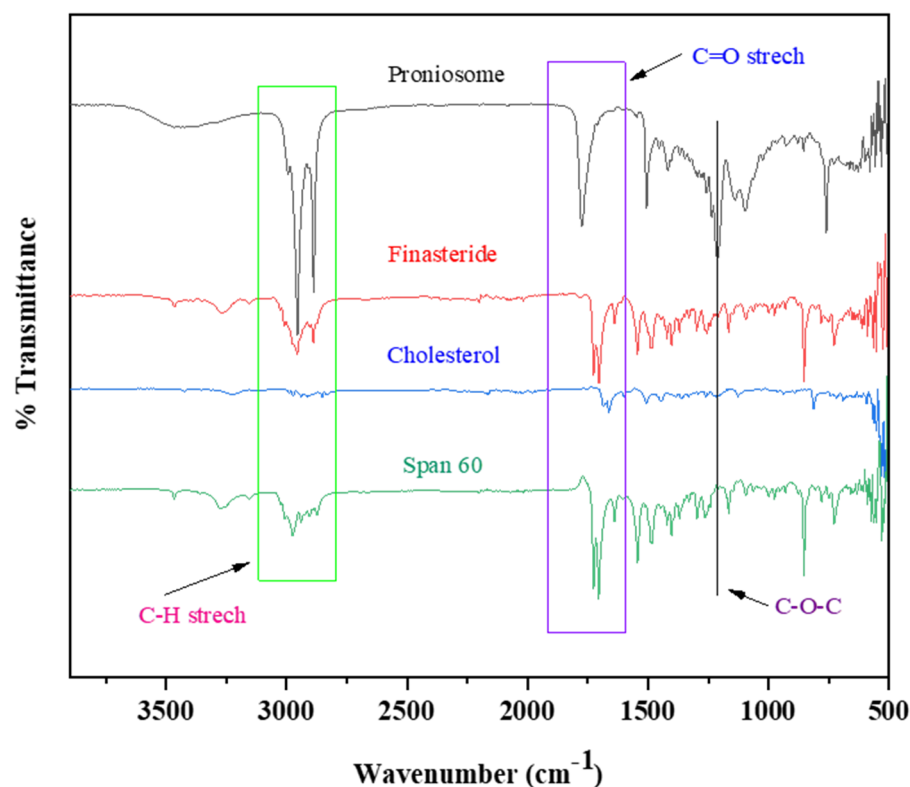

**Figure S1.** ATR-FTIR spectra of proniosome, finasteride, cholesterol, and span 60.

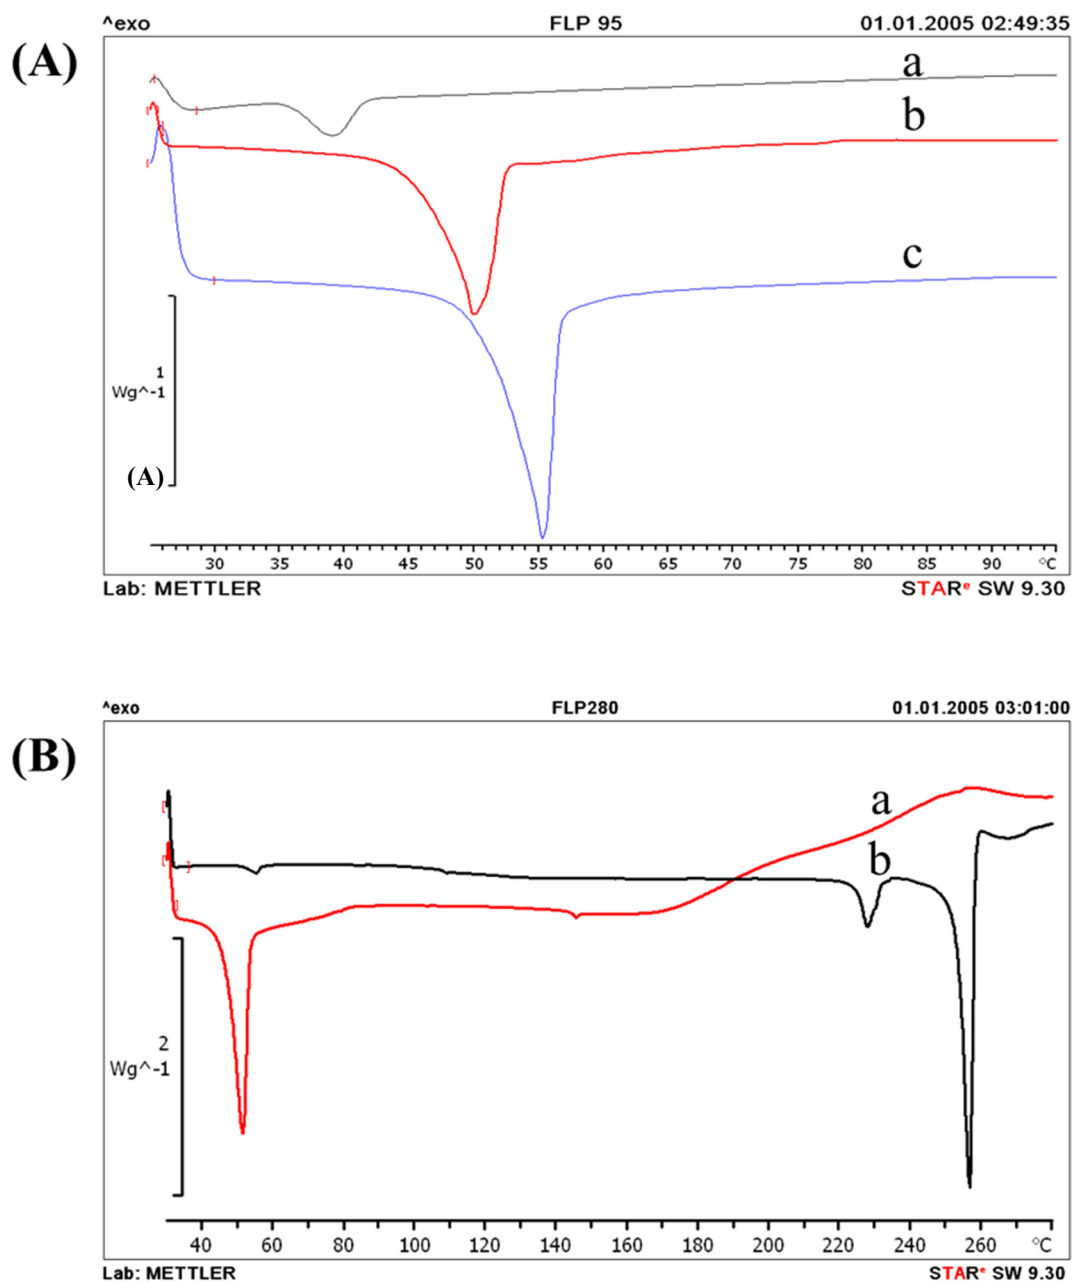

**Figure S2.** DSC thermograms of FLP and pure compositions: Figure (A): cholesterol a, FLP b and span 60 c scanned 25 – 95 °C; Figure (B): FLP a and bulk finasteride b scanned 30 – 280 °C.

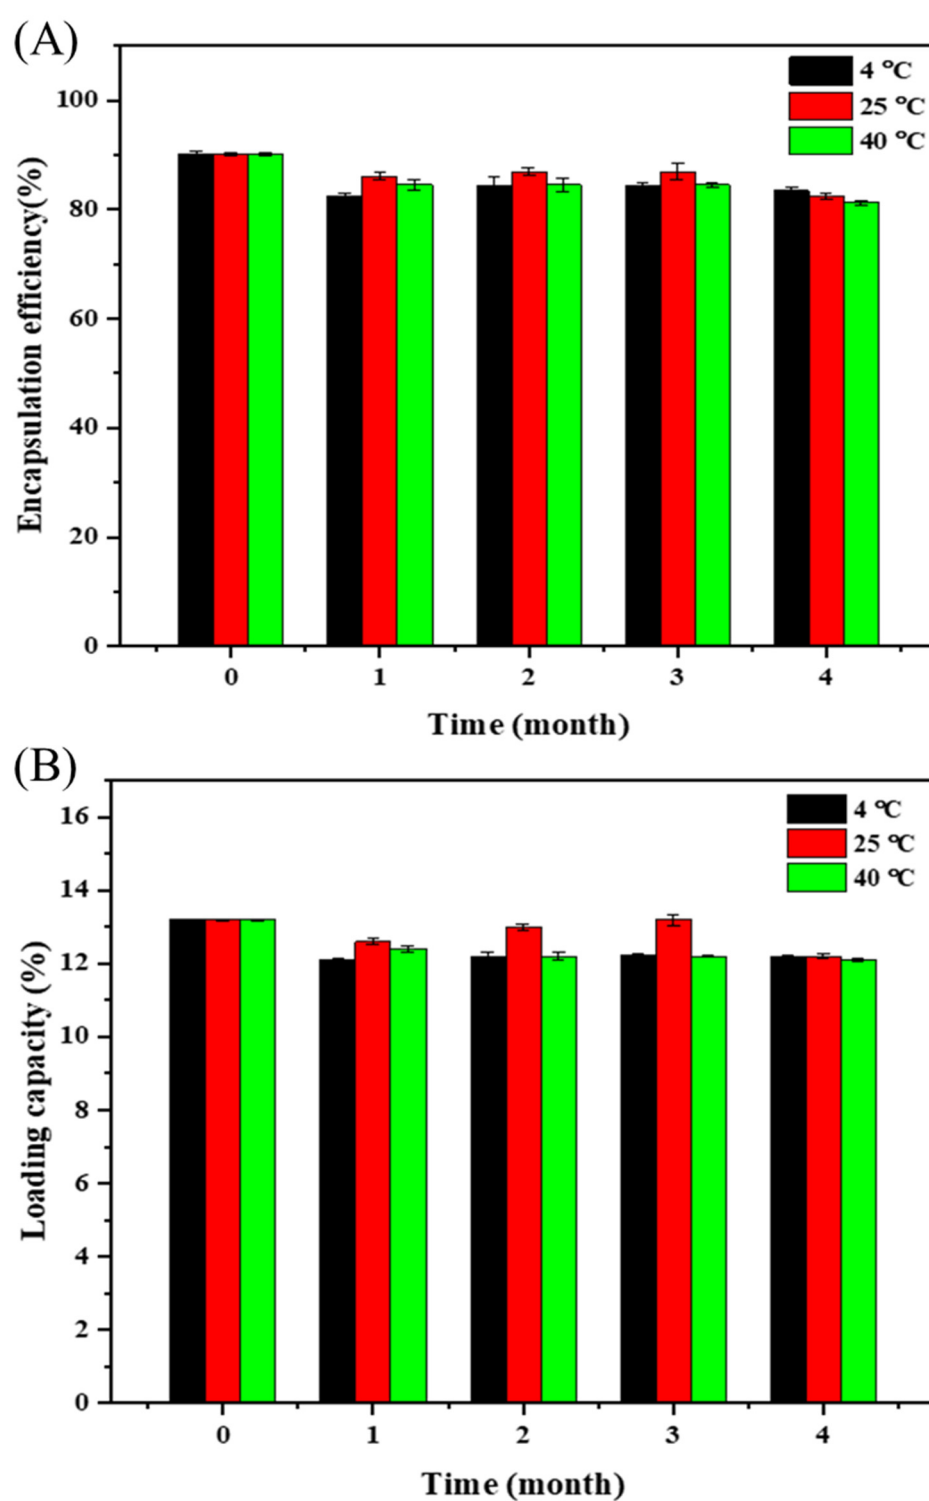

**Figure S3.** The impact of time and temperature during storage. (A) Encapsulation and (B) Loading capacity of FLP.

**Table S1.** Components of finasteride-loaded proniosomes.

| No. of the experiment | Finasteride )mg( | Cholesterol )mg( | Span 60 (mg( |
|-----------------------|------------------|------------------|--------------|
| 1                     | 230.61           | 309.30           | 309.30       |
| 2                     | 55.88            | 579.93           | 579.93       |
| 3                     | 11.55            | 309.30           | 309.30       |
| 4                     | 121.08           | 309.30           | 309.30       |
| 5                     | 55.88            | 193.31           | 193.31       |
| 6                     | 121.08           | 309.30           | 309.30       |
| 7                     | 121.08           | 309.30           | 309.30       |
| 8                     | 121.08           | 309.30           | 309.30       |
| 9                     | 186.27           | 579.93           | 579.93       |
| 10                    | 121.08           | 309.30           | 309.30       |
| 11                    | 121.08           | 439.35           | 439.35       |
| 12                    | 121.08           | 309.30           | 309.30       |
| 13                    | 55.88            | 347.96           | 347.96       |
| 14                    | 121.08           | 49.18            | 49.18        |
| 15                    | 186.27           | 193.31           | 193.31       |
| 16                    | 186.27           | 115.99           | 115.99       |
| 17                    | 121.08           | 569.41           | 569.41       |
| 18                    | 186.27           | 347.96           | 347.96       |
| 19                    | 121.08           | 179.24           | 179.24       |
| 20                    | 55.88            | 115.99           | 115.99       |

**Table S2.** Components of finasteride-loaded proniosomes. \*phosphate buffer solution pH 7.4 and ethanol at ratio of 1:1.

| Formulation                         | Finasteride (mg) | Cholesterol (mg) | Span 60 (mg) | Total lipid (mg) |
|-------------------------------------|------------------|------------------|--------------|------------------|
| 0.1% finasteride loaded-proniosomes | 7.76             | 197.18           | 219.62       | 416.8            |
| 0.5% finasteride loaded-proniosomes | 31.05            | 197.18           | 219.62       | 416.8            |
| 1% finasteride loaded-proniosomes   | 62.09            | 197.18           | 219.62       | 416.8            |
| 1% finasteride solutions*           | 62.09            | -                | -            | -                |

**Table S3.** ANOVA for the responses of finasteride-loaded proniosomes in CCD.

| Response        | Source                        | SS         | Df | MS        | F-value   | p-value             |
|-----------------|-------------------------------|------------|----|-----------|-----------|---------------------|
| <b>Mean</b>     | Model                         | 23467.5026 | 9  | 2607.5003 | 666.5085  | 0.0000 <sup>c</sup> |
| <b>Particle</b> | X <sub>1</sub>                | 6.6996     | 1  | 6.6996    | 1.7125    | 0.2270              |
| <b>Size</b>     | X <sub>2</sub>                | 8114.7108  | 1  | 8114.7108 | 2074.2179 | 0.0000 <sup>c</sup> |
|                 | X <sub>3</sub>                | 5846.5125  | 1  | 5846.5125 | 14944391  | 0.0000 <sup>c</sup> |
|                 | X <sub>1</sub> X <sub>2</sub> | 490.3626   | 1  | 490.3626  | 125.3430  | 0.0000 <sup>c</sup> |
|                 | X <sub>1</sub> X <sub>3</sub> | 662.9122   | 1  | 662.9122  | 169.4458  | 0.0000 <sup>c</sup> |
|                 | X <sub>2</sub> X <sub>3</sub> | 28.4225    | 1  | 28.4225   | 7.2651    | 0.0273 <sup>a</sup> |
|                 | X <sub>1</sub> <sup>2</sup>   | 2052.4421  | 1  | 2052.4421 | 524.6289  | 0.0000 <sup>c</sup> |
|                 | X <sub>2</sub> <sup>2</sup>   | 63.6608    | 1  | 63.6608   | 16.2725   | 0.0038 <sup>b</sup> |
|                 | X <sub>3</sub> <sup>2</sup>   | 40.7819    | 1  | 40.7819   | 10.4244   | 0.0121 <sup>b</sup> |

|                       |                               |          |    |          |            |                      |
|-----------------------|-------------------------------|----------|----|----------|------------|----------------------|
|                       | Lack of fit                   | 19.4241  | 3  | 6.4747   | 2.7266     | 0.1539 <sup>ns</sup> |
|                       | Cor total                     | 23498.8  | 17 |          |            |                      |
| %EE                   | Model                         | 843.6348 | 9  | 93.7372  | 117.4562   | 0.0000 <sup>c</sup>  |
|                       | X <sub>1</sub>                | 96.8652  | 1  | 96.8652  | 121.3757   | 0.0000 <sup>c</sup>  |
|                       | X <sub>2</sub>                | 241.6361 | 1  | 241.6361 | 302.7791   | 0.0000 <sup>c</sup>  |
|                       | X <sub>3</sub>                | 0.1117   | 1  | 0.1117   | 0.1400     | 0.7193 <sup>ns</sup> |
|                       | X <sub>1</sub> X <sub>2</sub> | 28.4029  | 1  | 28.4029  | 35.5899    | 0.0006 <sup>c</sup>  |
|                       | X <sub>1</sub> X <sub>3</sub> | 15.9996  | 1  | 15.9996  | 20.0482    | 0.0029 <sup>b</sup>  |
|                       | X <sub>2</sub> X <sub>3</sub> | 4.3887   | 1  | 43.887   | 0.0000     | 0.9943 <sup>ns</sup> |
|                       | X <sub>1</sub> <sup>2</sup>   | 118.4723 | 1  | 118.4723 | 148.4502   | 0.0000 <sup>c</sup>  |
|                       | X <sub>2</sub> <sup>2</sup>   | 228.9681 | 1  | 228.9681 | 286.9056   | 0.0000 <sup>c</sup>  |
|                       | X <sub>3</sub> <sup>2</sup>   | 3.1221   | 1  | 3.1221   | 3.9121     | 0.0885 <sup>ns</sup> |
|                       | Lack of fit                   | 3.0996   | 2  | 1.5498   | 3.1161     | 0.1322 <sup>ns</sup> |
|                       | Cor total                     | 849.2212 | 16 |          |            |                      |
| Drug Loading Capacity | Model                         | 589.3865 | 9  | 65.4874  | 11523.0040 | 0.0000 <sup>c</sup>  |
|                       | X <sub>1</sub>                | 235.8509 | 1  | 235.8509 | 41499.7525 | 0.0000 <sup>c</sup>  |
|                       | X <sub>2</sub>                | 169.3391 | 1  | 169.3391 | 29796.4992 | 0.0000 <sup>c</sup>  |
|                       | X <sub>3</sub>                | 0.2132   | 1  | 0.2132   | 37.5176    | 0.0004 <sup>c</sup>  |
|                       | X <sub>1</sub> X <sub>2</sub> | 30.1607  | 1  | 30.1607  | 5306.9984  | 0.0006 <sup>c</sup>  |
|                       | X <sub>1</sub> X <sub>3</sub> | 0.7565   | 1  | 0.7565   | 133.1051   | 0.0000 <sup>c</sup>  |
|                       | X <sub>2</sub> X <sub>3</sub> | 1.0212   | 1  | 1.0212   | 179.6830   | 0.0000 <sup>c</sup>  |
|                       | X <sub>1</sub> <sup>2</sup>   | 0.2299   | 1  | 0.2299   | 40.4498    | 0.0004 <sup>c</sup>  |
|                       | X <sub>2</sub> <sup>2</sup>   | 12.5579  | 1  | 12.5579  | 2209.6569  | 0.0000 <sup>c</sup>  |
|                       | X <sub>3</sub> <sup>2</sup>   | 0.0039   | 1  | 0.0039   | 0.6874     | 0.4344 <sup>ns</sup> |
|                       | Lack of fit                   | 0.0023   | 2  | 0.0011   | 0.1533     | 0.8617 <sup>ns</sup> |
|                       | Cor total                     | 589.4263 | 16 |          |            |                      |

X<sub>1</sub>: Finasteride concentration, X<sub>2</sub>: Total lipid, X<sub>3</sub>: Cholesterol proportion in total lipid, SS: Sum of square; Df: degree of freedom; MS: Mean square. <sup>a</sup> =  $p < 0.05$ , <sup>b</sup> =  $p < 0.01$ , <sup>c</sup> =  $p < 0.001$ , and <sup>ns</sup> = non-significant ( $p > 0.05$ ).
